# Supplementary material for: HIV-1 Transmission during Early Antiretroviral Therapy: Evaluation of Two HIV-1 Transmission Events in the HPTN 052 Prevention Study
Source: PubMed Central journal article supplement (PMC3782474; doi:10.1371/journal.pone.0071557), 2013-09-24
Supplement: pone.0071557.s001.pdf [file pone.0071557.s001.pdf]

### IRBs/ECs and Other Regulatory Bodies by Site

| Site                   | Affiliated IRBs/ECs and Regulatory Bodies                                                                                                                                                                                                                                                                                                                                                                                         |
|------------------------|-----------------------------------------------------------------------------------------------------------------------------------------------------------------------------------------------------------------------------------------------------------------------------------------------------------------------------------------------------------------------------------------------------------------------------------|
| Porto Alegre, Brazil   | <ul style="list-style-type: none"> <li>• UCLA Office for Protection of Research Subjects: Medical Institutional Review Board</li> <li>• Brazil Ministério da Saúde: CONEP: Comissão Nacional de Ética em Pesquisa</li> <li>• Gerencia de Ensino e Pesquisa: Comitê de Ética em Pesquisa do Grupo Hospitalar Conceição-GHC</li> </ul>                                                                                              |
| Rio de Janeiro, Brazil | <ul style="list-style-type: none"> <li>• UCLA Office for Protection of Research Subjects: Medical Institutional Review Board</li> <li>• Instituto de Pesquisa Clínica Evandro Chagas: Comitê de Ética em Pesquisa</li> <li>• Brazil Ministério da Saúde: CONEP: Comissão Nacional de Ética em Pesquisa</li> <li>• Grupo Hospitalar Conceição-GHC: Comitê de Ética em Pesquisa</li> </ul>                                          |
| Boston, MA, USA        | <ul style="list-style-type: none"> <li>• Fenway Community Health Center: Fenway Community Health Center Institutional Review Board</li> </ul>                                                                                                                                                                                                                                                                                     |
| Chennai, India         | <ul style="list-style-type: none"> <li>• Fenway Community Health Center: Fenway Community Health Center Institutional Review Board</li> <li>• YRG CARE Institutional Review Board</li> <li>• University of California, San Diego: Human Research Protections Program</li> <li>• Health Ministry Screening Committee (India)</li> </ul>                                                                                            |
| Pune, India            | <ul style="list-style-type: none"> <li>• National AIDS Research Institute (ICMR): National AIDS Research Institute (NARI) Ethics Committee</li> <li>• Johns Hopkins University School of Medicine: Johns Hopkins Medicine Institutional Review Board</li> <li>• Health Ministry Screening Committee (India)</li> </ul>                                                                                                            |
| Chiang Mai, Thailand   | <ul style="list-style-type: none"> <li>• Johns Hopkins Bloomberg School of Public Health Institutional Review Boards</li> <li>• Human Experimentation Committee, Research Institute for Health Sciences, Chiang Mai University</li> <li>• Research Ethics Committee, Faculty of Medicine, Chiang Mai University</li> <li>• Ethical Review Committee for Research in Human Subjects Ministry of Public Health, Thailand</li> </ul> |
| Kisumu, Kenya          | <ul style="list-style-type: none"> <li>• Kenya Medical Research Institute: KEMRI National Ethical Review Committee</li> <li>• CDC Atlanta: CDC National Center for HIV/AIDS, Viral Hepatitis, STDs and TB Prevention IRB</li> <li>• Kenya National Pharmacy and Poisons Board (PPB)</li> </ul>                                                                                                                                    |

| Site             | Affiliated IRBs/ECs and Regulatory Bodies                                                                                                                                                                                                                                                                                                                                                     |
|------------------|-----------------------------------------------------------------------------------------------------------------------------------------------------------------------------------------------------------------------------------------------------------------------------------------------------------------------------------------------------------------------------------------------|
| Harare, Zimbabwe | <ul style="list-style-type: none"> <li>• University of California at San Francisco: Committee on Human Research, Office of Research Administration</li> <li>• Medical Research Council of Zimbabwe: Medical Research Council of Zimbabwe (MRCZ) Institutional Review Board</li> <li>• Medicines Control Authority of Zimbabwe (MCAZ)</li> <li>• Research Council of Zimbabwe (RCZ)</li> </ul> |
| Blantyre, Malawi | <ul style="list-style-type: none"> <li>• University of Malawi College of Medicine: College of Medicine Research &amp; Ethics Committee (COMREC)</li> <li>• Johns Hopkins University Bloomberg School of Public Health: Institutional Review Board</li> </ul>                                                                                                                                  |
|                  | <ul style="list-style-type: none"> <li>•</li> </ul>                                                                                                                                                                                                                                                                                                                                           |

|                            |                                                                                                                                                                                                                                                                     |
|----------------------------|---------------------------------------------------------------------------------------------------------------------------------------------------------------------------------------------------------------------------------------------------------------------|
| Lilongwe, Malawi           | <ul style="list-style-type: none"> <li>• Malawi Ministry of Health &amp; Population: National Health Sciences Research Committee</li> <li>• University of North Carolina School of Medicine: Committee on the Protection of the Rights of Human Subjects</li> </ul> |
| Gaborone, Botswana         | <ul style="list-style-type: none"> <li>• Botswana Ministry of Health: Health Research and Development Committee</li> <li>• Harvard School of Public Health: Human Subjects Committee</li> </ul>                                                                     |
| Johannesburg, South Africa | <ul style="list-style-type: none"> <li>• University of Witwatersrand: Human Research Ethics Committee: Medical</li> <li>• Medicines Control Council (South Africa)</li> </ul>                                                                                       |
| Soweto, South Africa       | <ul style="list-style-type: none"> <li>• University of Witwatersrand: Human Research Ethics Committee: Medical</li> <li>• Medicines Control Council (South Africa)</li> </ul>                                                                                       |
